# Supplementary material for: Identification of COPD Inflammatory Endotypes Using Repeated Sputum Eosinophil Counts
Source: MDPI journal article supplement (doi:10.3390/biomedicines10102611), 2022-10-18
Supplement: s1 [file s1]

## **Online Data Supplement**

### **Stability of sputum eosinophil cell counts in COPD**

Augusta Beech<sup>1, 2</sup>, Natalie Jackson<sup>2</sup>, Dave Singh<sup>1, 2</sup>

<sup>1</sup>Division of Infection, Immunity and Respiratory Medicine, School of Biological Sciences,  
Faculty of Biology, Medicine and Health, Manchester Academic Health Science Centre, The  
University of Manchester, Manchester, UK

<sup>2</sup>Medicines Evaluation Unit, Manchester University NHS Foundation Trust, Manchester, UK

Corresponding author:

Augusta Beech

Department of Medicine and Health

University of Manchester

Education and Research Centre, M23 9LT, UK

Tel: +44 (0)161 946 4050 Fax +44 (0)1619461459

Email address: [augusta.beech@manchester.ac.uk](mailto:augusta.beech@manchester.ac.uk)

## Methods

### *Sputum measurements (evaluation of DCC)*

Differential cell counts were estimated manually using cell suspension obtained from a whole sputum sample, mounted onto slides to create cytopspins. Leucocyte viability was assessed by staining cells with 0.4% Trypan Blue solution (Merck, UK). Cells were stained using Eosin Y and Methylene Blue (Rapi-diff II stain, Atom scientific, UK). Four hundred of the following non-squamous cells were evaluated based on structure and characteristics; macrophages, neutrophils, eosinophils, lymphocytes and bronchial epithelial cells. Squamous cells were counted but not included in the count of 400 cells. Each sample was objectively assessed for quality; if the leukocyte viability was <50% and/or the squamous cell percentage was >30%, the sample was discarded on the basis of poor quality. DCC slides were quality checked and counts validated by a second observer, if there was a difference in counts of >10% between observers, the average of the two counts were reported.

### *qPCR Detection of Common Respiratory Pathogens*

DNA was extracted from homogenised sputum samples using QIAamp DNA mini Kit (QIAGEN, Crawley, West Sussex, UK); bacterial DNA was stored at -80 °C. Real-time qPCR was performed on *Haemophilus Influenzae* (*H. influenzae*), *Moraxella Catarrhalis* (*M. catarrhalis*), *Streptococcus Pneumoniae* (*S. pneumoniae*) and *Pseudomonas Aeruginosa* (*P. aeruginosa*), targeting the lipo-oligosaccharide glycosyltransferase-encoding gene (lgtC) of *H. influenzae*, the CopB outer membrane protein-encoding gene of *M. catarrhalis*, the autolysin-encoding gene (lytA) of *S. pneumoniae* and the gyrB gene of *P. aeruginosa* as previously described [1,2]. Details of primers and probes can be found in supplementary table 3. The thresholds for defining colonisation with individual bacterial species were based on the upper

limits of a healthy control cohort (details reported elsewhere [3]); *H. influenzae* =  $3.22 \times 10^5$ , *M. catarrhalis* =  $3.72 \times 10^3$ , *S. pneumoniae* =  $7.09 \times 10^6$  and *P. aeruginosa* =  $1.68 \times 10^2$  genome copies / mL.

### *Blood measurements*

Differential cell counts were estimated from EDTA-treated whole blood, using the automated systems; Sysmex XN10 & XN20 analysers (Wythenshawe Hospital clinical laboratory Manchester, UK) and Sysmex XN 9000 & XSi analysers (The Doctors Lab, London, UK), via fluorescence flow cytometry.

## **Results**

The clinical characteristics of patients found to be intermittently in the eosinophil<sup>HIGH</sup> group over 6 months were no different to those persistently in the eosinophil<sup>HIGH</sup> group or those with a sputum eosinophil % persistently <3% (Table S4).

### *Change in FEV<sub>1</sub> over 6 months*

Mean change between visits for the whole cohort was -0.03L and -1.28% for absolute and % predicted FEV<sub>1</sub> respectively. No association between change in FEV<sub>1</sub>, absolute or % predicted, and change in sputum eosinophil % between visits was observed ( $p = 0.18$  and  $0.27$ , respectively). Furthermore, there was no association between change in blood eosinophil count between visits and FEV<sub>1</sub>, absolute or % predicted ( $p=0.75$  and  $0.98$  respectively).

Changes in absolute and % predicted FEV<sub>1</sub> between visits for groups based on sputum eosinophil count at baseline were not different between Eosinophil<sup>LOW</sup> Eosinophil<sup>INT</sup> and Eosinophil<sup>HIGH</sup> groups. Furthermore, no association was observed between change in FEV<sub>1</sub>, absolute or % predicted, and change in sputum eosinophil % between visits, for Eosinophil<sup>LOW</sup>, Eosinophil<sup>INT</sup> and Eosinophil<sup>HIGH</sup> groups (p = 0.60 and 0.32, 0.84 and 0.74, and 0.09 and 0.08 respectively).

#### *Change in ICS use over 6 months*

We observed a change in ICS use for 7 / 98 patients, n=5 started ICS and for n=2 ICS treatment was removed (information for n=2 patients was not available). Baseline blood and sputum eosinophil counts, and change in eosinophil counts between visits were no different between those with a change in ICS versus those without. Furthermore, we found no association between change in eosinophil counts and FEV<sub>1</sub> in patients with a change in ICS use. However, the sample size here was too small to infer meaningful conclusions.

## Figures

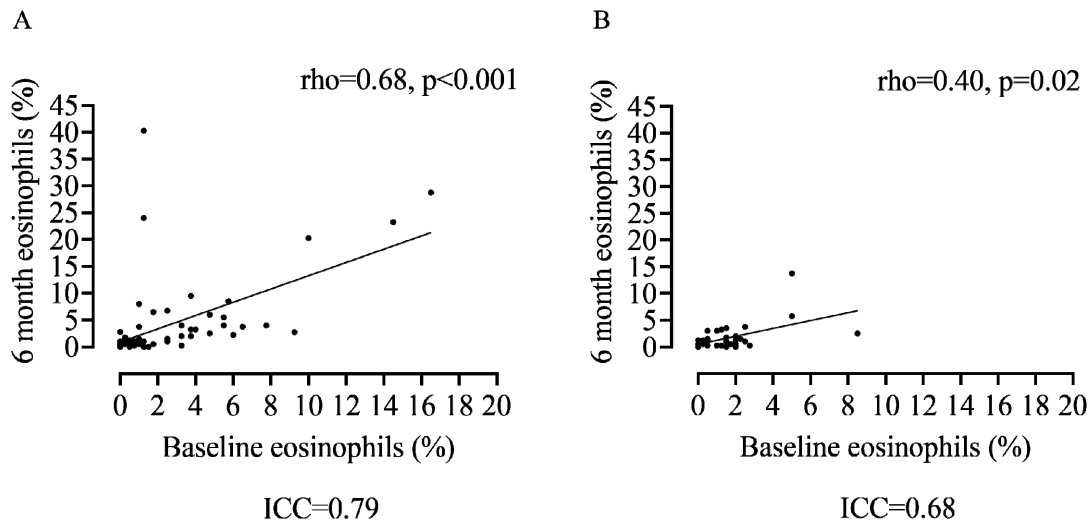

**Figure S1.** Association between baseline and 6 month measures of sputum eosinophil % for ICS users (A) versus non-users (B). n=66 and 34 respectively

Data normalised via  $\text{Log}(x+1)$  for calculation of ICC

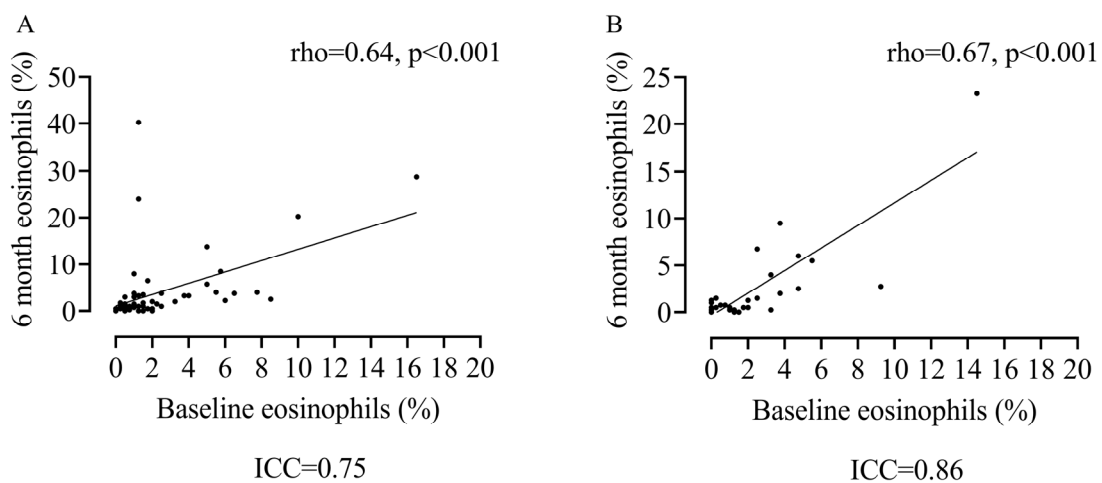

**Figure S2.** Association between baseline and 6 month measures of sputum eosinophil % for those with no exacerbations between visits (A) versus those with  $\geq 1$  (B). n=64 and 32 respectively

Data normalised via Log(x+1) for calculation of ICC

## Tables

**Table S1.** Baseline demographics for separate groups defined by baseline eosinophil %; Eosinophil<sup>LOW</sup> Eosinophil<sup>INT</sup> and Eosinophil<sup>HIGH</sup> : Summaries are presented as percentages or Mean (SD) as appropriate (n=43, 35, 22 for Eosinophil<sup>LOW</sup>, Eosinophil<sup>INT</sup> and Eosinophil<sup>HIGH</sup> respectively<sup>#</sup>). Post-hoc analyses for chi-squared tests were performed, with a Bonferroni correction.

| Characteristic                 | Eosinophil <sup>LOW</sup><br>n=43 | Eosinophil <sup>INT</sup><br>n=35 | Eosinophil <sup>HIGH</sup><br>n=22 | p-value         |
|--------------------------------|-----------------------------------|-----------------------------------|------------------------------------|-----------------|
| Gender n (Female/Male)         | 17/26                             | 14/21                             | 6/16                               | 0.40            |
| Age                            | 64.3 (8.0)                        | 67.1 (6.4)                        | 63.7 (7.7)                         | 0.15            |
| Smoking status (Current %)     | 37.2                              | 37.1                              | 59.1                               | 0.18            |
| Pack years                     | <b>35.0 (13.8)</b>                | <b>**52.5 (22.8)</b>              | <b>+40.2 (13.6)</b>                | <b>&lt;0.01</b> |
| BMI (kg/m <sup>2</sup> )       | 27.6 (5.2)                        | 27.8 (5.7)                        | 28.3 (3.8)                         | 0.87            |
| Exacerbations (1 year period)  | 0.97 (1.3)                        | 0.71 (0.94)                       | 1.0 (1.3)                          | 0.86            |
| 0 (%)                          | 51.4                              | 51.7                              | 52.9                               | 0.24            |
| 1 (%)                          | 22.9                              | 31.1                              | 17.6                               | 0.70            |
| ≥2 (%)                         | 25.7                              | 17.2                              | 29.5                               | 0.63            |
| Exacerbations (between visits) | 0.60 (1.2)                        | 0.38 (0.65)                       | 0.59 (0.96)                        | 0.72            |
| Post-BD FEV <sub>1</sub> (L)   | 1.74 (0.56)                       | 1.69 (0.49)                       | 1.92 (0.49)                        | 0.26            |
| Post-BD FEV <sub>1</sub> (%)   | 64.0 (17.0)                       | 63.3 (15.7)                       | 62.6 (21.1)                        | 0.96            |
| GOLD Category (%)              |                                   |                                   |                                    |                 |
| 1                              | 16.3                              | 14.3                              | 18.2                               | 0.92            |
| 2                              | 65.1                              | 62.9                              | 68.2                               | 0.92            |
| 3                              | 18.6                              | 22.8                              | 13.6                               | 0.69            |
| 4                              | 0.0                               | 0.0                               | 0.0                                | -               |
| mMRC                           | 3.0 [0.0-4.0]                     | 3.0 [0.0-4.0]                     | 4.0 [0.0-4.0]                      | 0.41            |
| CAT                            | 18.6 (8.3)                        | 19.1 (6.7)                        | 21.4 (6.6)                         | 0.67            |
| SGRQ-C (Total)                 | 46.8 (16.9)                       | 47.9 (19.1)                       | 50.0 (22.0)                        | 0.88            |
| Atopy (%)                      | 13.2                              | 6.3                               | 10.0                               | 0.63            |

|                           |             |             |                         |             |
|---------------------------|-------------|-------------|-------------------------|-------------|
| Chronic bronchitis (%)    | 79.2        | 70.8        | 73.3                    | 0.80        |
| ICS Use (%)               | <b>69.8</b> | <b>48.6</b> | <b><sup>+</sup>86.4</b> | <b>0.01</b> |
| LABA+LAMA+ICS (%)         | 53.5        | 40.0        | 72.7                    | -           |
| LABA+LAMA (%)             | 2.3         | 11.4        | 9.1                     | -           |
| ICS only (%)              | 2.3         | 0.0         | 4.5                     | -           |
| LABA only (%)             | 2.3         | 0.0         | 0.0                     | -           |
| LAMA only (%)             | 16.3        | 20.0        | 0.0                     | -           |
| No inhaled medication (%) | 9.3         | 11.4        | 1.5                     | -           |

<sup>#</sup>The following data were missing; 20 retrospective exacerbation history, 4 exacerbation history between visits, 10 atopy categorisation, 37 chronic bronchitis categorisation, 25 mMRC questionnaires, 29 CAT questionnaires and 37 SGRQ's.

<sup>\*\*</sup>, p<0.01 compared to Eos<sup>LOW</sup>

<sup>+</sup>, p<0.05 compared to Eos<sup>INT</sup>

BD, bronchodilator; BMI, body mass index; CAT, COPD assessment test; DCC, differential cell count; FEV<sub>1</sub>, forced expiratory volume in 1 second; FVC, forced vital capacity; GOLD, Global Initiative for Chronic Obstructive Lung Disease; ICS, inhaled corticosteroids; LABA, long acting beta agonist; LAMA, long acting muscarinic antagonist; mMRC, modified medical re-search council questionnaire; SGRQ, St George's respiratory questionnaire.

**Table S2.** Baseline bacterial qPCR results for common respiratory pathogens measured in sputum, for separate groups defined by baseline eosinophil %; Eosinophil<sup>LOW</sup> Eosinophil<sup>INT</sup> and Eosinophil<sup>HIGH</sup> : n=13, 12 and 9 respectively. Summaries are presented as percentages or median [range] as appropriate. *Haemophilus influenzae*, *H.influenzae*; *Moraxella catarrhalis*, *M.catarrhalis*; potentially pathogenic microorganism, PPM; *Pseudomonas aeruginosa*, *P.aeruginosa*; quantitative polymerase chain reaction, qPCR; reverse, R; *Streptococcus pneumoniae*, *S.pneumoniae*.

| Baseline sputum characteristic                      | Eosinophil <sup>LOW</sup> n=13      | Eosinophil <sup>INT</sup> n=12      | Eosinophil <sup>HIGH</sup> n=9       | P-value     |
|-----------------------------------------------------|-------------------------------------|-------------------------------------|--------------------------------------|-------------|
| <b>Total PPM Load (genome copies/ml)</b>            | 8.12E+05 [0.00E+00-9.25E+07]        | 2.03E+05 [2.48E+02-1.58E+08]        | 8.73E+03 [0.00E+00-5.12E+06]         | 0.25        |
| <b><i>H.influenzae</i> Load (genome copies/ml)</b>  | <b>2.67E+04 [0.00E+00-9.05E+07]</b> | <b>4.12E+03 [0.00E+00-1.58E+08]</b> | <b>*2.75E+02 [0.00E+00-1.63E+04]</b> | <b>0.03</b> |
| <b><i>S.pneumoniae</i> Load (genome copies/ml)</b>  | 2.42E+05 [0.00E+00-2.02E+06]        | 2.81E+04 [0.00-1.25E+06]            | 8.53E+03 [0.00E+00-5.12E+06]         | 0.99        |
| <b><i>M.catarrhalis</i> Load (genome copies/ml)</b> | 0.00E+00 [0.00E+00-5.63E+02]        | 0.00E+00 [0.00E+00-1.34E+04]        | 0.00E+00 [0.00E+00-3.27E+02]         | 0.30        |
| <b><i>P.aeruginosa</i> Load (genome copies/ml)</b>  | 0.00E+00 [0.00E+00-5.88E+06]        | 0.00E+00 [0.00E+00-0.00E+00]        | 0.00E+00 [0.00E+00-0.00E+00]         | 0.46        |
| <b>No colonisation (% of patients)</b>              | 53.8                                | 66.7                                | 100.0                                | 0.06        |
| <b><i>H.Influenzae</i> (% of patients)</b>          | 38.5                                | 33.3                                | 0.0                                  | 0.11        |
| <b><i>S.Pneumoniae</i> (% of patients)</b>          | 0.0                                 | 0.0                                 | 0.0                                  | n/a         |
| <b><i>M.Catarrhalis</i> (% of patients)</b>         | 0.0                                 | 8.3                                 | 0.0                                  | 0.39        |
| <b><i>P.Aeruginosa</i> (% of patients)</b>          | 7.7                                 | 0.0                                 | 0.0                                  | 0.44        |
| <b>&gt;1 ppm (% of patients)</b>                    | 0.0                                 | 8.3                                 | 0.0                                  | 0.39        |

\* , p<0.05 compared to Eos<sup>LOW</sup>



**Table S3.** Details of qPCR targets and the lower limits of detection for qPCR detection of different PPMs.

| Target species        | Gene target                      | Primers | Sequence (5'-3')         | Probe sequence with Reporter and Quencher | Lower limit of detection (genome copies/ml) |
|-----------------------|----------------------------------|---------|--------------------------|-------------------------------------------|---------------------------------------------|
| <i>H.influe nzae</i>  | P4                               | HI-F    | CCgggTgCggTAGAATTTAATAA  | 6FAM-                                     | 8.70x10 <sup>1</sup>                        |
|                       | Lipoprotein gene                 | HI-R    | CTgATTTTTCAgTgCTgTCTTTgC | ACAGCCACAACGGTAA<br>AGTGTTCACG-DB         |                                             |
| <i>S.pneum oniae</i>  | Spn9082                          | SP-F    | AgTCgTTCCAAgTAACAAgTCT   | ROX-                                      | 1.38x10 <sup>3</sup>                        |
|                       | gene fragment                    | SP-R    | ACCAACTCgACCACCTCTTT     | TACATGTAGGAAACTA<br>TTTCCTCACAAA-BHQ2     |                                             |
| <i>M.catar rhalis</i> | CopB outer membrane protein gene | MC-F    | gTgAgTgCCgCCAAGACAA      | 6JOE-                                     | 1.76x10 <sup>2</sup>                        |
|                       |                                  | MC-R    | TgTATCgCCTgCCAAGACAA     | TGCTTTTGCAGCTGTTA<br>GCCAGCCTAA-BHQ1      |                                             |
| <i>P.aerugi nosa</i>  | gyrB gene                        | PA-F    | TCCAAGTTTAAGGTGGTAGGCTG  | FAM-AGG TAA ATC                           | 6.00                                        |
|                       |                                  | PA-R    | ACCACTTCGTCAATCTAAAAGAC  | CGG GGT TTC AAG<br>GCC-TAMRA              |                                             |

GA

Forward, F; *Haemophilus influenzae*, *H.influenzae*; *Moraxella catarrhalis*, *M.catarrhalis*; *Pseudomonas aeruginosa*, *P.aeruginosa*; quantitative polymerase chain reaction, qPCR; reverse, R; *Streptococcus pneumoniae*, *S.pneumoniae*.

**Table S4.** Baseline demographics for separate groups defined by change in eosinophil % between baseline and 6 months using a threshold of 3% sputum eosinophils; Eosinophil Persistently >3%, Eosinophil Intermittently >3% , Eosinophil <3%: Summaries are presented as percentages or Mean (SD) as appropriate (n=15, 18, 67 for Eosinophil Persistently >3% , Eosinophil Intermittently >3% , Eosinophil <3% respectively<sup>#</sup>).

| Characteristic                 | Eosinophil<br>Persistently >3%<br>n=15 | Eosinophil<br>Intermittently >3%<br>n=18 | Eosinophil <3%<br>n=67 | p-<br>value |
|--------------------------------|----------------------------------------|------------------------------------------|------------------------|-------------|
| Gender (Female/Male)           | 2/13                                   | 9/11                                     | 23/44                  | 0.14        |
| Age                            | 61.1 (8.17)                            | 65.8 (6.8)                               | 65.2 (7.6)             | 0.81        |
| Smoking status (Current %)     | 53.3                                   | 44.4                                     | 38.8                   | 0.57        |
| Pack years                     | 41.5 (14.2)                            | 45.8 (21.7)                              | 41.5 (19.2)            | 0.69        |
| BMI (kg/m <sup>2</sup> )       | 27.4 (3.5)                             | 29.9 (4.1)                               | 27.4 (5.5)             | 0.16        |
| Exacerbations (1 year period)  | 0.9 (1.2)                              | 1.2 (1.3)                                | 0.8 (1.2)              | 0.54        |
| 0 (%)                          | 58.3                                   | 35.7                                     | 55.6                   | 0.38        |
| 1 (%)                          | 16.7                                   | 28.6                                     | 24.1                   | 0.77        |
| ≥2 (%)                         | 25.0                                   | 35.7                                     | 20.3                   | 0.48        |
| Exacerbations (between visits) | 0.5 (1.1)                              | 0.3 (0.6)                                | 0.6 (1.1)              | 0.67        |
| Post-BD FEV <sub>1</sub> (L)   | 1.9 (0.5)                              | 1.7 (0.4)                                | 1.8 (0.5)              | 0.53        |
| Post-BD FEV <sub>1</sub> (%)   | 63.3 (14.5)                            | 62.2 (22.2)                              | 63.8 (16.8)            | 0.94        |
| Δ Post-BD FEV <sub>1</sub> (L) | -0.0 (0.2)                             | 0.0 (0.2)                                | -0.0 (0.2)             | 0.71        |
| Δ Post-BD FEV <sub>1</sub> (%) | -0.1 (5.9)                             | 0.0 (6.5)                                | -1.9 (8.4)             | 0.54        |
| GOLD Category (%)              |                                        |                                          |                        |             |
| 1                              | 13.3                                   | 16.7                                     | 16.4                   | 0.95        |
| 2                              | 73.3                                   | 66.7                                     | 62.7                   | 0.73        |
| 3                              | 13.4                                   | 16.6                                     | 20.9                   | 0.77        |
| 4                              | 0.0                                    | 0.0                                      | 0.0                    | -           |
| mMRC                           | 4.0 [0-4]                              | 3.0 [1.0-4.0]                            | 3.0 [0.0-4.0]          | 0.52        |
| CAT                            | 21.7 (7.6)                             | 17.7 (4.8)                               | 19.2 (7.9)             | 0.47        |
| SGRQ-C (Total)                 | 53.8 (24.6)                            | 43.2 (16.2)                              | 47.5 (17.6)            | 0.50        |

|                        |      |      |      |      |
|------------------------|------|------|------|------|
| Atopy (%)              | 15.4 | 5.9  | 10.0 | 0.69 |
| Chronic bronchitis (%) | 70.0 | 75.0 | 75.6 | 0.93 |
| ICS Use (%)            | 86.7 | 66.7 | 61.2 | 0.17 |

<sup>#</sup>The following data were missing; 20 retrospective exacerbation history, 4 exacerbation history between visits, 10 atopy categorisation, 37 chronic bronchitis categorisation, 25 mMRC questionnaires, 29 CAT questionnaires and 37 SGRQ's, 3  $\Delta$  Post-BD FEV<sub>1</sub> (L).

BD, bronchodilator; BMI, body mass index; CAT, COPD assessment test; DCC, differential cell count; FEV<sub>1</sub>, forced expiratory volume in 1 second; GOLD, Global Initiative for Chronic Obstructive Lung Disease; ICS, inhaled corticosteroids; LABA, long acting beta agonist; LAMA, long acting muscarinic antagonist; mMRC, modified medical re-search council questionnaire; SGRQ, St George's respiratory questionnaire;  $\Delta$ , change between baseline and 6 month visit.

## References

1. McCulloch, E.; Lucas, C.; Ramage, G.; Williams, C. Improved early diagnosis of *Pseudomonas aeruginosa* by real-time PCR to prevent chronic colonisation in a paediatric cystic fibrosis population. *J Cyst Fibros* **2011**, *10*, 21-24, doi:10.1016/j.jcf.2010.09.001.
2. Garcha, D.S.; Thurston, S.J.; Patel, A.R.; Mackay, A.J.; Goldring, J.J.; Donaldson, G.C.; McHugh, T.D.; Wedzicha, J.A. Changes in prevalence and load of airway bacteria using quantitative PCR in stable and exacerbated COPD. *Thorax* **2012**, *67*, 1075-1080, doi:10.1136/thoraxjnl-2012-201924.
3. Beech, A.; Lea, S.; Li, J.; Jackson, N.; Mulvanny, A.; Singh, D. Airway Bacteria Quantification Using Polymerase Chain Reaction Combined with Neutrophil and Eosinophil Counts Identifies Distinct COPD Endotypes. *Biomedicines* **2021**, *9*, doi:10.3390/biomedicines9101337.
